# Supplementary material for: Response of soil extracellular enzyme activity and stoichiometry to short-term warming and phosphorus addition in desert steppe
Source: PeerJ journal article supplement (doi:10.7717/peerj.16227), 2023-10-19

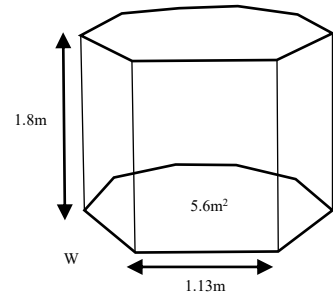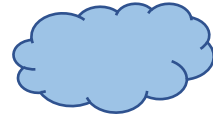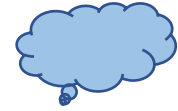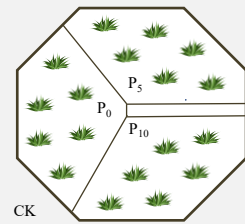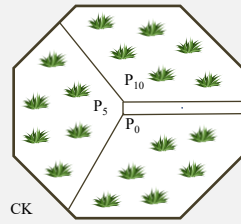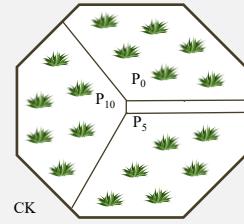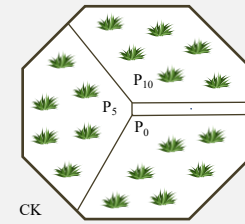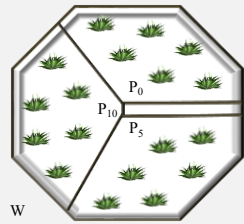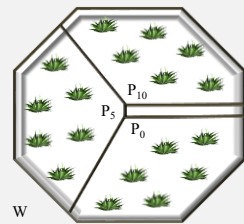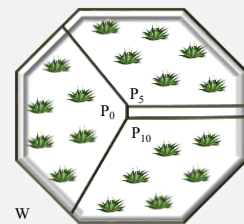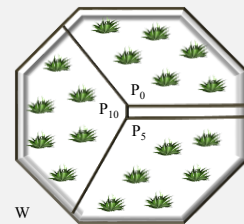

Supplement: Figure_S1.pdf [file Figure_S1.pdf]
