# Supplementary material for: Response of soil extracellular enzyme activity and stoichiometry to short-term warming and phosphorus addition in desert steppe
Source: PeerJ. 2023 Oct 19;11:e16227. doi: 10.7717/peerj.16227 (PMC10590576; doi:10.7717/peerj.16227)
Supplement: Supplemental Information 1 [file peerj-11-16227-s001.xlsx]

## Sheet: Sheet1
Sample		pH	Soil moisture content (SMC)	Soil organic carbon (SOC )	Soil total nitrogen (TN)	Soil total phosphorus (TP)	SOC:TN	SOC:TP	TN:TP	Dissolved organic carbon (DOC)	Soil ammonium nitrogen (NH4+-N) and nitrate nitrogen(NO3--N) (AN)	Soil available phosphorus (AP)	DOC:AN	DOC:AP	AN:AP	β-1,4-glucosidase (BG)	Leucine aminopeptidase,β-1,4-N-acetylglucosaminidase(LAP+NAG)	Alkaline phosphatase(ALP)	ln (BG)/ln (LAP + NAG)	ln (BG)/ln (ALP)	ln (LAP + NAG)/ln (ALP)	Microbial biomass carbon (MBC)	Microbial biomass nitrogen (MBN)	Microbial biomass phosphorus (MBP)	MBC:MBN	MBC:MBP	MBN:MBP
P0	1	8.64	10.1438	7.69058	0.762537	0.324431	10.0855	23.7048	2.35038	19.575	6.11	3.2	3.20376	6.11719	1.90938	25.9066	12.693	56.3762	1.28077	0.807157	0.630213	93.7422	6.496	3.375	14.4308	27.7755	1.92474
P0	1	8.64	9.81162	5.16095	0.4975	0.321816	10.3738	16.0369	1.54591	19.395	6.86	3.3	2.82726	5.87727	2.07879	21.541	10.3647	49.7195	1.31284	0.78588	0.598609	85.4489	6.624	2.875	12.8999	29.7214	2.304
P0	1	8.46	9.79519	8.3494	0.734203	0.373721	11.3721	22.3412	1.96457	21.965	6.66	4	3.29805	5.49125	1.665	25.4561	17.3611	58.7892	1.13409	0.794548	0.700604	89.5111	6.816	4.375	13.1325	20.4597	1.55794
P0	1	8.45	9.17	6.69595	0.668496	0.352755	10.0164	18.9819	1.89507	22.19	7.37	3.8	3.01085	5.83947	1.93947	20.0296	13.1376	47.2872	1.16375	0.777236	0.667872	101.6	7.216	3.125	14.0798	32.512	2.30912
P5	2	8.53	11.4315	6.57619	0.531429	0.407679	12.3746	16.1308	1.30355	19.285	6.84	28.5	2.81944	0.676667	0.24	12.8698	9.98023	26.5525	1.11053	0.779136	0.701592	47.2	4.672	26.25	10.1027	1.7981	0.177981
P5	2	8.4	11.5486	7.44627	0.711787	0.444577	10.4614	16.7491	1.60104	16.195	6.32	30.4	2.5625	0.53273	0.207895	12.993	8.30206	27.4174	1.21162	0.774469	0.639199	55.1644	7.408	33.375	7.4466	1.65287	0.221963
P5	2	8.62	9.5199	5.62394	0.448603	0.362233	12.5366	15.5258	1.23844	17.585	5.53	29.8	3.17993	0.590101	0.18557	11.7705	6.80047	23.3383	1.28618	0.782706	0.608551	56.7644	4.4	36.125	12.901	1.57133	0.121799
P5	2	8.56	10.79	6.03528	0.490842	0.369933	12.2958	16.3145	1.32684	17.975	6.52	33	2.7569	0.544697	0.197576	14.8112	9.74322	23.3445	1.18397	0.855578	0.722638	56.6578	5.056	32.5	11.206	1.74332	0.155569
P10	3	8.45	13.2595	6.74571	0.581579	0.454456	11.599	14.8435	1.27973	20.73	7.08	42	2.92797	0.493571	0.168571	15.0663	12.3293	18.0387	1.07981	0.93775	0.868439	65.4222	6.72	27.125	9.73545	2.41188	0.247742
P10	3	8.34	10.5921	8.26156	0.723765	0.617186	11.4147	13.3858	1.17269	16.06	6.87	45.4	2.3377	0.353744	0.151322	13.1159	9.89142	18.8804	1.12312	0.87601	0.779976	64.9689	7.392	26.375	8.78908	2.46328	0.280265
P10	3	8.57	10.8776	5.42858	0.505825	0.408892	10.7321	13.2763	1.23706	19.69	6.28	39.6	3.13535	0.497222	0.158586	9.28445	7.26783	20.1211	1.12346	0.742343	0.660763	66.6044	6.032	25.125	11.0419	2.65092	0.24008
P10	3	8.55	11.79	8.17127	0.673016	0.454364	12.1413	17.984	1.48123	17.035	6.7	39.4	2.54254	0.43236	0.170051	11.1286	10.9371	24.3569	1.00725	0.754668	0.749232	66.2044	5.984	25.875	11.0636	2.55863	0.231266
WP0	4	8.39	8.23224	7.69866	0.741571	0.487564	10.3816	15.79	1.52097	17.235	7.74	3.9	2.22674	4.41923	1.98462	14.9452	10.3908	18.1793	1.15527	0.932457	0.807134	59.5911	5.392	3	11.0518	19.8637	1.79733
WP0	4	8.38	8.33333	8.05982	0.804391	0.352127	10.0198	22.889	2.28438	24.225	8.68	4	2.7909	6.05625	2.17	13.2727	9.18345	19.0193	1.1661	0.877866	0.752823	68	5.984	3.375	11.3636	20.1481	1.77304
WP0	4	8.34	8.24022	5.94436	0.522024	0.341473	11.3872	17.408	1.52874	20.725	8.43	4.2	2.45848	4.93452	2.00714	10.4755	9.95392	14.6951	1.02222	0.874057	0.855053	52.8889	4.96	3.375	10.6631	15.6708	1.46963
WP0	4	8.46	8.78	6.51289	0.576923	0.30885	11.289	21.0876	1.86797	16.79	5.6	3.1	2.99821	5.41613	1.80645	8.41616	10.6106	18.8661	0.901899	0.725192	0.804073	46.4533	4	2.75	11.6133	16.8921	1.45455
WP5	5	8.48	9.30008	8.4788	0.885375	0.354596	9.5765	23.9112	2.49686	20.2	10.12	16.8	1.99605	1.20238	0.602381	15.6066	7.33062	12.7967	1.37932	1.07787	0.781448	87.1022	6.144	16.875	14.1768	5.16161	0.364089
WP5	5	8.4	10.1049	9.31871	0.754186	0.489772	12.356	19.0266	1.53987	22.125	11.37	24.2	1.94591	0.914256	0.469835	12.1965	7.50675	14.5361	1.24077	0.934436	0.75311	80.3556	6.064	24.25	13.2512	3.31363	0.250062
WP5	5	8.4	9.08646	8.40947	0.811133	0.444533	10.3676	18.9176	1.82469	25.825	11.78	19.1	2.19228	1.35209	0.616754	14.7906	8.09771	12.0767	1.28802	1.08137	0.839562	95.9111	6.992	23.5	13.7173	4.08132	0.297532
WP5	5	8.49	9.22	7.14141	0.58851	0.350218	12.1347	20.3914	1.68041	25.155	11.75	18.8	2.14085	1.33803	0.625	14.7775	9.91522	15.0087	1.17394	0.994268	0.846949	82.9333	5.2	17.75	15.9487	4.6723	0.292958
WP10	6	8.37	9.64567	7.79561	0.693284	0.490215	11.2445	15.9024	1.41424	21.345	8.61	48.9	2.47909	0.436503	0.176074	9.87013	8.30697	16.6873	1.08144	0.813428	0.752171	92.9867	5.76	29.5	16.1435	3.15209	0.195254
WP10	6	8.61	9.40902	6.85358	0.58125	0.519738	11.7911	13.1866	1.11835	22.18	7.65	55.6	2.89935	0.398921	0.13759	10.8506	10.3983	14.987	1.01819	0.880703	0.864973	73.0044	6.192	28.75	11.7901	2.53929	0.215374
WP10	6	8.53	9.42928	7.1885	0.690909	0.465394	10.4044	15.4461	1.48457	27.16	7.36	40.9	3.69022	0.664059	0.179951	9.01337	7.41371	12.5216	1.09753	0.86993	0.792628	81.6	5.408	31.875	15.0888	2.56	0.169663
WP10	6	8.6	9.87	7.48892	0.599806	0.41123	12.4856	18.211	1.45857	24.98	9.13	42.2	2.73604	0.591943	0.216351	9.54469	9.49677	15.6014	1.00224	0.821146	0.819313	82.2222	5.632	36.75	14.5991	2.23734	0.153252
